# Supplementary material for: Targeted Dendrimer-Coated Magnetic Nanoparticles for Selective Delivery of Therapeutics in Living Cells
Source: MDPI journal article supplement (doi:10.3390/molecules25092252), 2020-05-10
Supplement: s1 [file s1]

## Targeted dendrimer-coated magnetic nanoparticles for selective delivery of therapeutics in living cells

Paola Parlanti, Adriano Boni, Giovanni Signore, Melissa Santi

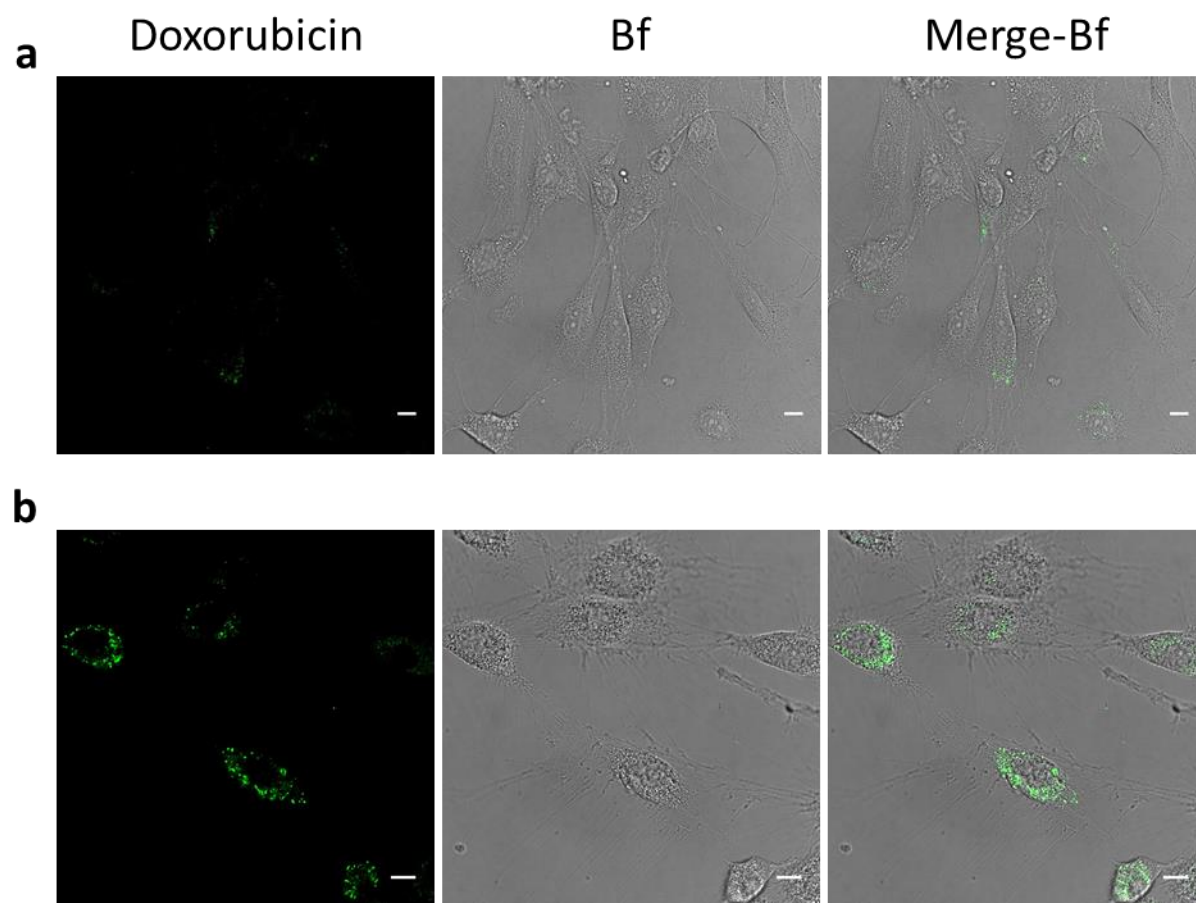

**Figure S1: Targeted nanoparticles internalization in cells.** MIA-PaCa-2 cells were treated with Dend-NP-Dox untargeted (a) and Apt-Dend-NP-Dox targeted (b) nanoparticles for 2 h at 37 °C and then imaged by confocal microscopy. Scale bar: 10  $\mu$ m.
